# Supplementary material for: Autophagy regulates hepatocyte identity and epithelial-to-mesenchymal and mesenchymal-to-epithelial transitions promoting Snail degradation
Source: PubMed Central journal article supplement (PMC4650445; doi:10.1038/cddis.2015.249), 2015-09-10

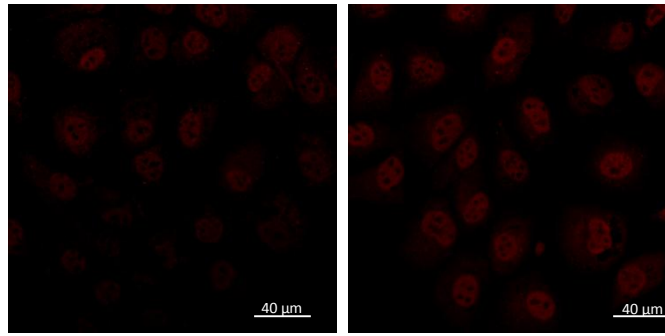

IF: snail

shCTR

shBCN1

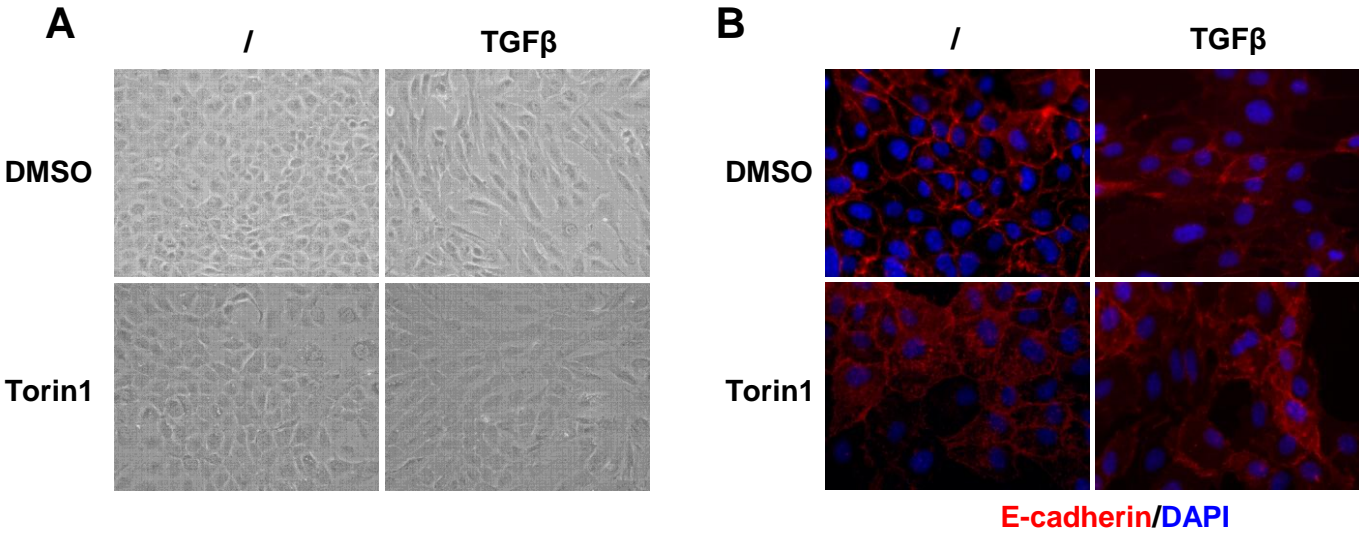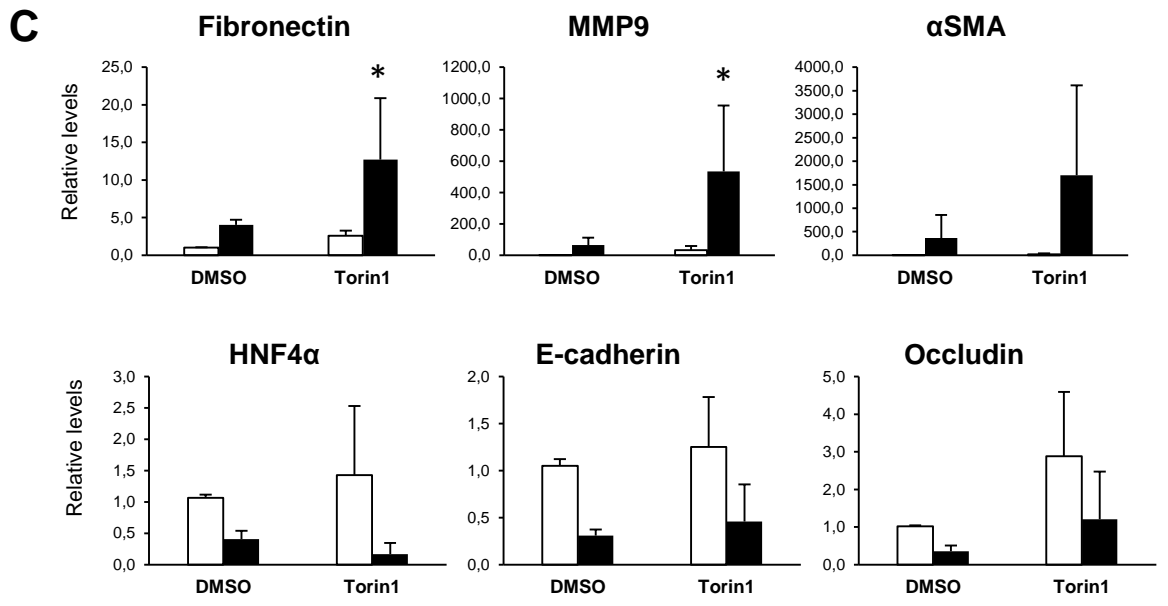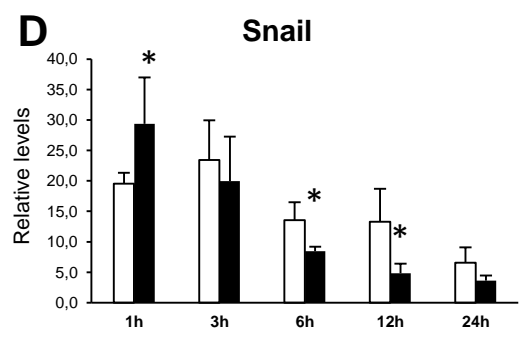

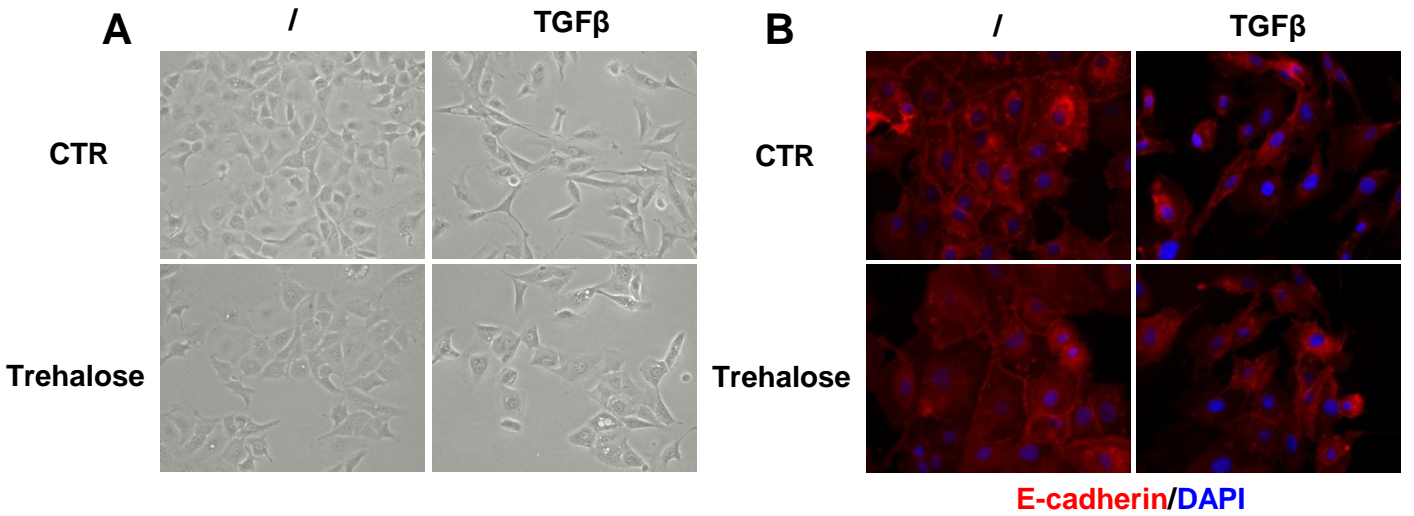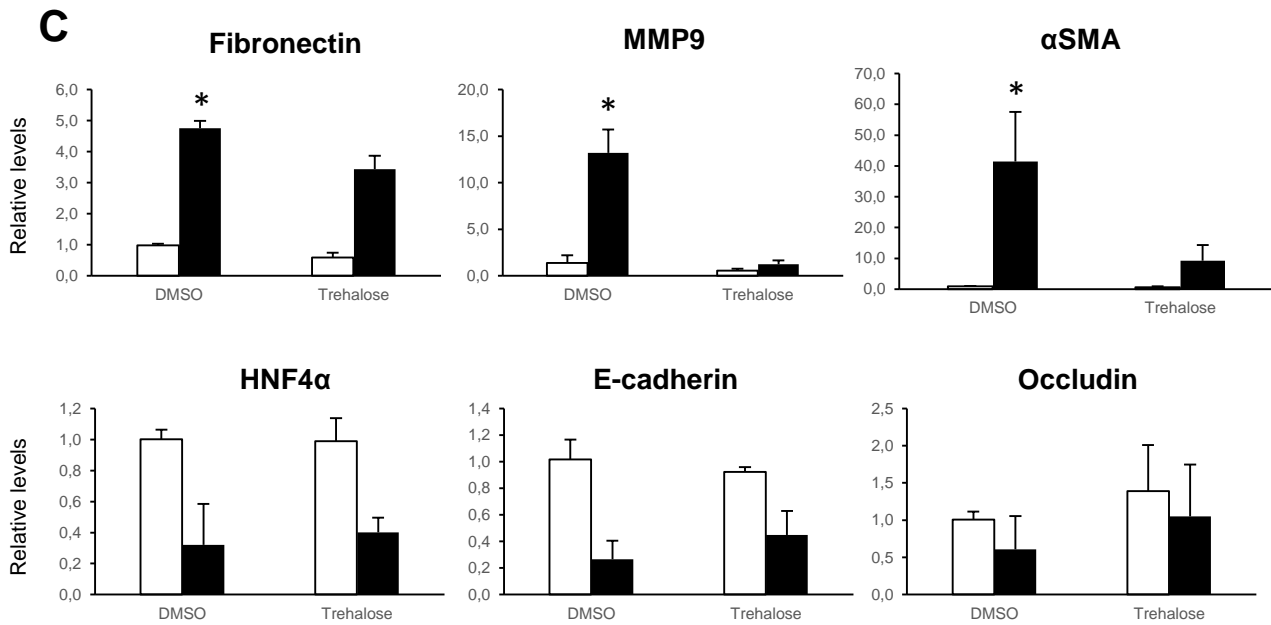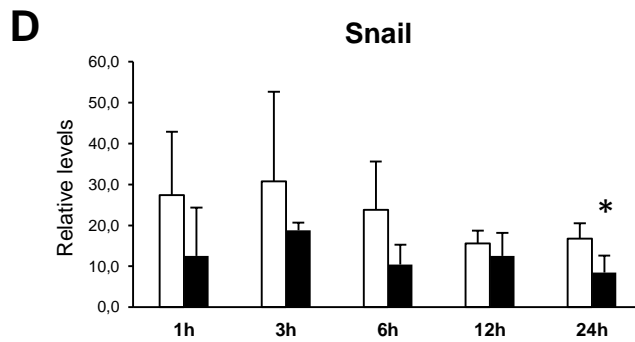

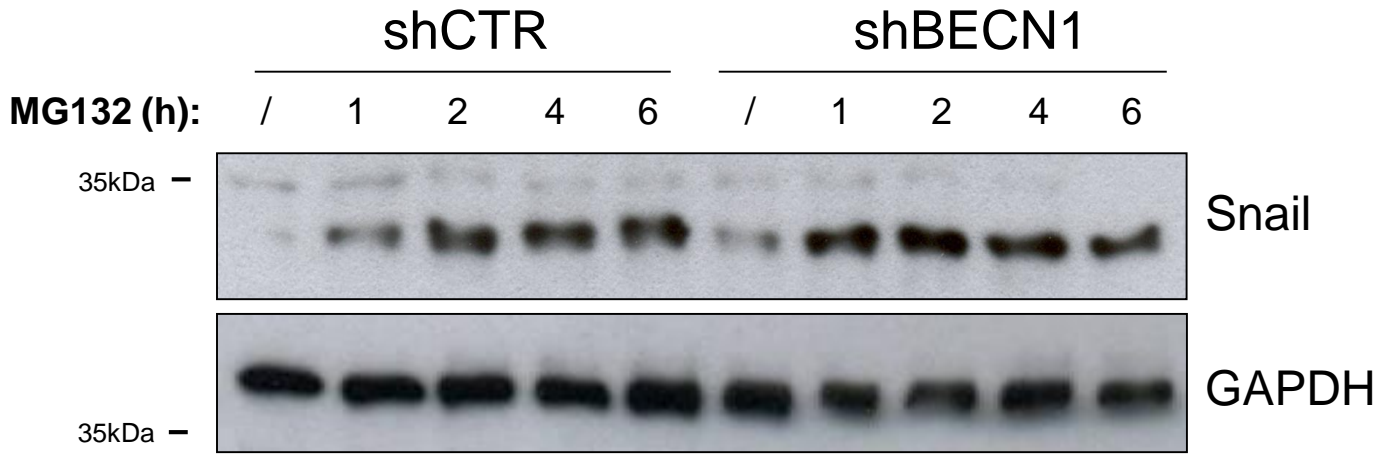

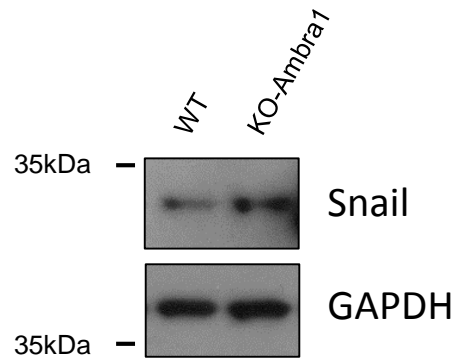

Supplement: cddis2015249x1.pdf [file cddis2015249x1.pdf]
